# Supplementary material for: Mortality and institutionalization of patients with dementia treated in primary care: Influence of neuropsychiatric symptoms (NeDEM project)
Source: Research Square preprint supplement (doi:10.21203/rs.3.rs-4765073/v1), 2024-09-15
Supplement: Supplementary file 1 [file 0c3634af03e74535fa98225e.docx]

**Supplement 1** Sociodemographic and clinical characteristics of the included and nonlocalized patients.

|  | Including n=124 | | Not located n = 5 | | p |
| --- | --- | --- | --- | --- | --- |
| n | % (95% CI) | n | % (95% CI) |
| Age |  |  |  |  |  |
| <79 years | 38 | 30.6 (22.7; 39.6) | 0 | 0 | 0.141 |
| ≥ 80 years | 86 | 69.4 (60.4; 77.3) | 5 | 100 |
| Sex |  |  |  |  |  |
| Men | 38 | 30.6 (22.7; 39.6) | 0 | 0 | 0.141 |
| Women | 86 | 69.4 (60.4; 77.3) | 5 | 100 |
| Educational level |  |  |  |  |  |
| Illiterate, without studies or primary education | 25 | 20.2 (13.5; 28.3) | 1 | 20.0 (0.5; 71.6) | 0.993 |
| Secondary studies, high school or university | 99 | 79.8 (71.7; 86.5) | 4 | 80.0 (28.4; 99.5) |
| GDS Stadium (Global Deterioration Scale) |  |  |  |  |  |
| Borderline impairment and mild dementia (GDS 3 and 4) | 44 | 35.5 (27.1; 44.6) | 2 | 40.0 (5.3; 85.3) | 0.842 |
| Moderate dementia (GDS 5) | 40 | 32.3 (24.1; 41.2) | 2 | 40.0 (5.3; 85.3) |
| Moderately severe and severe dementia (GDS 6 and 7) | 40 | 32.3 (24.1; 41.2) | 1 | 20.0 (0.5; 71.6) |
| Barthel index |  |  |  |  |  |
| Low-moderate independence and dependence (61-100 points) | 60 | 48.4 (39.3; 57.5) | 1 | 20.0 (0.5; 71.6) | 0.213 |
| Severe and total dependence (≤ 60 points) | 64 | 51.6 (42.5; 60.7) | 4 | 80.0 (28.4; 99.5) |
| Total NPI scale score, mean (SD) | 25.0 (20.2) | | 22.4 (8.2) | | 0.772 |
