# Supplementary material for: Mortality and institutionalization of patients with dementia treated in primary care: Influence of neuropsychiatric symptoms (NeDEM project)
Source: Research Square preprint supplement (doi:10.21203/rs.3.rs-4765073/v1), 2024-09-15
Supplement: Supplementary file 2 [file 88038051599a611adbea5513.docx]

**Supplement 3** Survival curves for mortality according to other factors related to the patient

*GDS* Global Deterioration Scale, *CEI* cholinesterase inhibitors
