# Supplementary material for: Mortality and institutionalization of patients with dementia treated in primary care: Influence of neuropsychiatric symptoms (NeDEM project)
Source: Research Square preprint supplement (doi:10.21203/rs.3.rs-4765073/v1), 2024-09-15
Supplement: Supplementary file 3 [file b85ecf6f55c310def917ccec.docx]

**Supplement 2** Survival curves for institutionalization according to other factors related to the patient or caregiver

*GDS* Global Deterioration Scale, *CEI* cholinesterase inhibitors
